# Supplementary material
Source: ML conference proceedings conference paper supplement (https://proceedings.mlr.press/v97/chen19n.html)
Supplement: Supplementary file 1 [file chen19n-supp.pdf]

---

# Supplementary Materials for “RaFM: Rank-Aware Factorization Machines”

## 1. Proof of Theorem 6

*Proof.* Recall the estimated gradient:

$$\widehat{grad} = \frac{\partial L(\mathcal{B}_{1,m}, y)}{\partial \mathbf{v}^{(p)}|_{\mathcal{F}_p - \mathcal{F}_{p+1}}} + \frac{1}{N} \sum_{\mathbf{x}'} \frac{\partial L(\mathcal{B}'_{1,m}, y)}{\partial \mathbf{v}^{(p-1)}|_{\mathcal{F}_p}} \mathbf{G}^{-1} \frac{\partial^2 L(\mathcal{B}_{1,p-1}, \mathcal{B}_{1,p})}{\partial \mathbf{v}^{(p-1)}|_{\mathcal{F}_p} \partial \mathbf{v}^{(p)}|_{\mathcal{F}_p - \mathcal{F}_{p+1}}}$$

According to the chain rule and the fact that  $\mathcal{B}_{1,p-1}$  does not contain  $\mathbf{v}^{(p)}|_{\mathcal{F}_p - \mathcal{F}_{p+1}}$ , we have

$$\begin{aligned} & \frac{\partial^2 L(\mathcal{B}_{1,p-1}, \mathcal{B}_{1,p})}{\partial \mathbf{v}^{(p-1)}|_{\mathcal{F}_p} \partial \mathbf{v}^{(p)}|_{\mathcal{F}_p - \mathcal{F}_{p+1}}} \\ &= L_{12}(\mathcal{B}_{1,p-1}, \mathcal{B}_{1,p}) \left( \frac{\partial \mathcal{B}_{1,p-1}}{\partial \mathbf{v}^{(p-1)}|_{\mathcal{F}_p}} \right)^\top \frac{\partial \mathcal{B}_{1,p}}{\partial \mathbf{v}^{(p)}|_{\mathcal{F}_p - \mathcal{F}_{p+1}}} \\ & \quad + L_{22}(\mathcal{B}_{1,p-1}, \mathcal{B}_{1,p}) \left( \frac{\partial \mathcal{B}_{1,p}}{\partial \mathbf{v}^{(p-1)}|_{\mathcal{F}_p}} \right)^\top \frac{\partial \mathcal{B}_{1,p}}{\partial \mathbf{v}^{(p)}|_{\mathcal{F}_p - \mathcal{F}_{p+1}}} \\ & \quad + L_2(\mathcal{B}_{1,p-1}, \mathcal{B}_{1,p}) \frac{\partial^2 \mathcal{B}_{1,p}}{\partial \mathbf{v}^{(p-1)}|_{\mathcal{F}_p} \partial \mathbf{v}^{(p)}|_{\mathcal{F}_p - \mathcal{F}_{p+1}}} \end{aligned} \tag{S1}$$

where  $L_2$  means the partial derivative of  $L$  with regard to its first value, while  $L_{12}$  and  $L_{22}$  are the second-order partial derivatives of  $L$ . Note that the last line of (S1) equals 0 because that each pairwise interaction in the RaFM will not contain vectors from different FMs. Therefore,

$$\frac{\partial^2 L(\mathcal{B}_{1,p-1}, \mathcal{B}_{1,p})}{\partial \mathbf{v}^{(p-1)}|_{\mathcal{F}_p} \partial \mathbf{v}^{(p)}|_{\mathcal{F}_p - \mathcal{F}_{p+1}}} = \mathbf{H} \frac{\partial \mathcal{B}_{1,p}}{\mathbf{v}^{(p)}|_{\mathcal{F}_p - \mathcal{F}_{p+1}}}$$

where  $\mathbf{H}$  is a  $(|\mathcal{F}_p| D_{p-1}) \times 1$  matrix:

$$\mathbf{H} = L_{12}(\mathcal{B}_{1,p-1}, \mathcal{B}_{1,p}) \left( \frac{\partial \mathcal{B}_{1,p-1}}{\mathbf{v}^{(p-1)}|_{\mathcal{F}_p}} \right)^\top + L_{22}(\mathcal{B}_{1,p-1}, \mathcal{B}_{1,p}) \left( \frac{\partial \mathcal{B}_{1,p}}{\mathbf{v}^{(p-1)}|_{\mathcal{F}_p}} \right)^\top$$

Then we have

$$\begin{aligned} \widehat{grad} &= L_1(\mathcal{B}_{1,m}, y) \frac{\partial \mathcal{B}_{1,m}}{\partial \mathbf{v}^{(p)}|_{\mathcal{F}_p - \mathcal{F}_{p+1}}} \\ & \quad + \frac{1}{N} \sum_{\mathbf{x}'} L_1(\mathcal{B}'_{1,m}, y) \frac{\partial \mathcal{B}'_{1,m}}{\partial \mathbf{v}^{(p-1)}|_{\mathcal{F}_p}} \mathbf{G}^{-1} \mathbf{H} \frac{\partial \mathcal{B}_{1,p}}{\mathbf{v}^{(p)}|_{\mathcal{F}_p - \mathcal{F}_{p+1}}} \\ &= L_1(\mathcal{B}_{1,m}, y) \frac{\partial \mathcal{B}_{1,m}}{\partial \mathbf{v}^{(p)}|_{\mathcal{F}_p - \mathcal{F}_{p+1}}} + \lambda \frac{\partial \mathcal{B}_{1,p}}{\mathbf{v}^{(p)}|_{\mathcal{F}_p - \mathcal{F}_{p+1}}} \end{aligned}$$

where

$$\lambda = \frac{1}{N} \sum_{\mathbf{x}'} L_1(\mathcal{B}'_{1,m}, y) \frac{\partial \mathcal{B}'_{1,m}}{\partial \mathbf{v}^{(p-1)}|_{\mathcal{F}_p}} \mathbf{G}^{-1} \mathbf{H}$$

Note that  $\lambda$  is the multiplication of a  $1 \times |\mathcal{F}_p| D_{p-1}$  matrix, a  $|\mathcal{F}_p| D_{p-1} \times |\mathcal{F}_p| D_{p-1}$  matrix, and a  $|\mathcal{F}_p| D_{p-1} \times 1$  matrix, and thus is a scalar. Moreover, the derivative of  $\mathcal{B}_{1,m}$  and  $\mathcal{B}_{1,p}$  with respect to  $\mathbf{v}^{(p)}|_{\mathcal{F}_p - \mathcal{F}_{p+1}}$  is the same. Therefore, the direction of  $\widehat{grad}$  is parallel to that of  $L_1(\mathcal{B}_{1,m}, y) \left( \frac{\partial \mathcal{B}_{1,m}}{\partial \mathbf{v}^{(p)}|_{\mathcal{F}_p - \mathcal{F}_{p+1}}} \right)$ , i.e.  $\partial L(\mathcal{B}_{1,m}, y) / \partial \mathbf{v}^{(p)}|_{\mathcal{F}_p - \mathcal{F}_{p+1}}$ .  $\square$

## 2. Performance Bound of the Learning Algorithm

**Theorem S1.** Assume there exist two nonnegative functions  $d(\cdot)$  and  $\Delta(\cdot, \cdot)$  such that  $d$  is monotonically increasing, and for all  $f_1(\cdot), f_2(\cdot)$  we have

$$\begin{aligned} d\left(\frac{1}{N}\sum_{\mathbf{x}}L(f_1(\mathbf{x}), y)\right) &\leq d\left(\frac{1}{N}\sum_{\mathbf{x}}L(f_2(\mathbf{x}), y)\right) \\ &\quad + d\left(\frac{1}{N}\sum_{\mathbf{x}}\Delta(f_1(\mathbf{x}), f_2(\mathbf{x}))\right) \end{aligned} \quad (\text{S2})$$

then regarding the training error of the  $k$ -th FM model, i.e.  $\mathcal{B}_{k,k}$ , we have

$$\begin{aligned} d\left(\frac{1}{N}\sum_{\mathbf{x}}L(\mathcal{B}_{k,k}^*, y)\right) &\leq d\left(\frac{1}{N}\sum_{\mathbf{x}}L(\mathcal{B}_{1,m}^*, y)\right) \\ &\quad + \sum_{p=k}^{m-1} d\left(\frac{1}{N}\sum_{\mathbf{x}}\Delta(\mathcal{B}_{1,p}^*, \mathcal{B}_{1,p+1}^*)\right) \end{aligned} \quad (\text{S3})$$

where  $\mathcal{B}_{1,m}^*$  is the optimal  $\mathcal{B}_{1,m}$ , and  $\mathcal{B}_{1,p}^*$  is defined in the same way.

**Remark:** In practice,  $\Delta$  represents the error of expressing  $f_2$  by  $f_1$ . Eq. (S2) is an extension to the triangle inequality, and can be applied to both regression tasks and classification tasks. In regression tasks,  $L$  is the square loss, then we can set  $d$  as the square root function and  $\Delta = L$ . In classification tasks,  $L$  is the logarithm loss, then we can let  $d$  be an identity function, and define  $\Delta$  as

$$\Delta(f_1(\mathbf{x}), f_2(\mathbf{x})) = C_{\theta, \delta} \mathcal{D}_{KL}[f_1(\mathbf{x}) \| f_2(\mathbf{x})] + \log \delta \quad (\text{S4})$$

where  $\delta > 1$ ,  $C_{\theta, \delta} = \frac{\log \delta}{\theta \log \delta + (1-\theta) \log \frac{1-\theta}{1-\theta/\delta}}$ , and  $\theta = \min_{\mathbf{x}} [yf_2(\mathbf{x}) + (1-y)(1-f_2(\mathbf{x}))]$ .  $\mathcal{D}_{KL}$  is the KL divergence of two binomial variables. The readers can refer to Section 3 in the supplementary material for the proof of Eq. (S2) for logarithm loss.

In order to prove Theorem S1, we first provide the following lemma:

**Lemma S2.** The following inequalities hold

$$d\left(\frac{1}{N}\sum_{\mathbf{x}}l(\mathcal{B}_{l,k}^*, y)\right) \leq d\left(\frac{1}{N}\sum_{\mathbf{x}}L(\mathcal{B}_{l-1,k}^*, y)\right) \quad (\text{S5})$$

*Proof.* Note that we have  $\mathcal{B}_{l,k} = \mathcal{B}_{l-1,k}$  provided that

$$\mathbf{v}_i^{(l)} = \begin{bmatrix} \mathbf{0}_{D_l - D_{l-1}} \\ \mathbf{v}_i^{(l-1)} \end{bmatrix}, \forall i \in \mathcal{F}_l$$

And such solution also satisfies the constraint (12) in the main body of the paper. Therefore  $\mathcal{B}_{l-1,k}$  is a submodel of  $\mathcal{B}_{l,k}$ , and thus the optimal training error of  $\mathcal{B}_{l,k}$  is smaller than  $\mathcal{B}_{l-1,k}$ , and (S5) follows.  $\square$

*Proof of Theorem S1.* According to (S5) we have

$$\begin{aligned} d\left(\frac{1}{N}\sum_{\mathbf{x}}L(\mathcal{B}_{k,k}^*, y)\right) &\leq d\left(\frac{1}{N}\sum_{\mathbf{x}}L(\mathcal{B}_{k-1,k}^*, y)\right) \leq d\left(\frac{1}{N}\sum_{\mathbf{x}}L(\mathcal{B}_{k-2,k}^*, y)\right) \\ &\quad \dots \\ &\leq d\left(\frac{1}{N}\sum_{\mathbf{x}}L(\mathcal{B}_{1,k}^*, y)\right) \end{aligned}$$

Moreover, according to (S2) we have

$$\begin{aligned}
d\left(\frac{1}{N}\sum_{\mathbf{x}}L(\mathcal{B}_{1,k}^*,y)\right) &\leq d\left(\frac{1}{N}\sum_{\mathbf{x}}L(\mathcal{B}_{1,k+1}^*,y)\right) + d\left(\frac{1}{N}\sum_{\mathbf{x}}\Delta(\mathcal{B}_{1,k}^*,\mathcal{B}_{1,k+1}^*)\right) \\
&\leq d\left(\frac{1}{N}\sum_{\mathbf{x}}L(\mathcal{B}_{1,k+2}^*,y)\right) + \sum_{p=k}^{k+1} d\left(\frac{1}{N}\sum_{\mathbf{x}}\Delta(\mathcal{B}_{1,p}^*,\mathcal{B}_{1,p+1}^*)\right) \\
&\dots \\
&\leq d\left(\frac{1}{N}\sum_{\mathbf{x}}L(\mathcal{B}_{1,m}^*,y)\right) + \sum_{p=k}^{m-1} d\left(\frac{1}{N}\sum_{\mathbf{x}}\Delta(\mathcal{B}_{1,p}^*,\mathcal{B}_{1,p+1}^*)\right)
\end{aligned}$$

Therefore we have

$$d\left(\frac{1}{N}\sum_{\mathbf{x}}L(\mathcal{B}_{k,k}^*,y)\right) \leq d\left(\frac{1}{N}\sum_{\mathbf{x}}L(\mathcal{B}_{1,m}^*,y)\right) + \sum_{p=k}^{m-1} d\left(\frac{1}{N}\sum_{\mathbf{x}}\Delta(\mathcal{B}_{1,p}^*,\mathcal{B}_{1,p+1}^*)\right)$$

□

### 3. Quasi-Triangle Inequality for Logarithmic Loss

The following proposition is an extension of the triangle inequality for log loss.

**Proposition S3.** Suppose  $y \in \{0, 1\}$ ,  $0 < \hat{y}_1, \hat{y}_2 < 1$ , and define the log loss function  $L(\hat{y}_i, y)$  and the KL divergence  $\mathcal{D}_{KL}(\hat{y}_1 \parallel \hat{y}_2)$  as

$$\begin{aligned}
L(\hat{y}_i, y) &= -y \log \hat{y}_i - (1-y) \log(1-\hat{y}_i) \\
\mathcal{D}_{KL}(\hat{y}_1 \parallel \hat{y}_2) &= \hat{y}_1 \log \frac{\hat{y}_1}{\hat{y}_2} + (1-\hat{y}_1) \log \frac{1-\hat{y}_1}{1-\hat{y}_2}
\end{aligned}$$

then  $\forall \delta > 1, 0 < \theta \leq y\hat{y}_1 + (1-y)(1-\hat{y}_1)$ , we have

$$L(\hat{y}_2, y) \leq L(\hat{y}_1, y) + C_{\theta, \delta} \mathcal{D}_{KL}(\hat{y}_1 \parallel \hat{y}_2) + \log \delta \quad (\text{S6})$$

where

$$C_{\theta, \delta} = \frac{\log \delta}{\theta \log \delta + (1-\theta) \log \frac{1-\theta}{1-\theta/\delta}} \quad (\text{S7})$$

Before proving Proposition S3, we first provide some lemmas.

**Lemma S4.**  $\forall \theta > 0, \delta > 1$ , we have  $C_{\theta, \delta} > 0$ , and  $C_{\theta, \delta}$  monotonically decreases when  $\theta$  increases.

*Proof.* Consider  $g(\theta) = 1/C_{\theta, \delta} = \theta + \left[(1-\theta) \log \frac{1-\theta}{1-\theta/\delta} / \log \delta\right]$ , then we have

$$\begin{aligned}
g'(\theta) \log \delta &= \log \delta - \log \frac{1-\theta}{1-\theta/\delta} - 1 + \frac{1}{\delta} \frac{1-\theta}{1-\theta/\delta} \\
&= -\log \left(\frac{1-\theta}{\delta} \frac{1-\theta}{1-\theta/\delta}\right) + \left(\frac{1}{\delta} \frac{1-\theta}{1-\theta/\delta} - 1\right) > 0
\end{aligned}$$

here we use the fact that  $\log x < (x-1)$  unless  $x=1$ . Due to that  $\log \delta > 0$ , we have  $g'(\theta) \geq 0$ , thus  $g(\theta)$  is an increasing function. Moreover we have

$$g(\theta) > g(0) = 0$$

Therefore,  $C_{\theta, \delta} = 1/g(\theta)$  is a decreasing function with respect to  $\theta$ , and  $C_{\theta, \delta} > 0$ . □

---

**Lemma S5.** For  $0 < \hat{y}_1, \hat{y}_2 < 1$ , we have

$$\log \frac{\hat{y}_1}{\hat{y}_2} \leq C_{\hat{y}_1, \delta} \mathcal{D}_{KL}(\hat{y}_1 \| \hat{y}_2) + \log \delta \quad (\text{S8})$$

*Proof.* When  $\hat{y}_1 < \delta \hat{y}_2$ , we have  $\log(\hat{y}_1/\hat{y}_2) \leq \log \delta$ , thus (S8) holds due to the nonnegativity of the KL divergence. Now we discuss the case when  $\hat{y}_1 \geq \delta \hat{y}_2$ . Consider the ratio between  $\mathcal{D}_{KL}(\hat{y}_1 \| \hat{y}_2)$  and  $\log(\hat{y}_1/\hat{y}_2)$ :

$$\frac{\mathcal{D}_{KL}(\hat{y}_1 \| \hat{y}_2)}{\log(\hat{y}_1/\hat{y}_2)} = \hat{y}_1 + (1 - \hat{y}_1) \frac{\log(1 - \hat{y}_1) - \log(1 - \hat{y}_2)}{\log \hat{y}_1 - \log \hat{y}_2} = \hat{y}_1 + (1 - \hat{y}_2) h(\hat{y}_1, \hat{y}_2)$$

where  $h(\hat{y}_1, \hat{y}_2) = \log \frac{1 - \hat{y}_1}{1 - \hat{y}_2} / \log \frac{\hat{y}_1}{\hat{y}_2}$ . It is easy to show that

$$\frac{\partial h}{\partial \hat{y}_2} = - \frac{\mathcal{D}_{KL}(\hat{y}_2 \| \hat{y}_1)}{(\log \hat{y}_1 - \log \hat{y}_2)^2 \hat{y}_2 (1 - \hat{y}_2)} \leq 0$$

Therefore according to  $\hat{y}_1 \geq \delta \hat{y}_2$ , we have  $h(\hat{y}_1, \hat{y}_2) \geq h(\hat{y}_1, \hat{y}_1/\delta)$ , and

$$\frac{\mathcal{D}_{KL}(\hat{y}_1 \| \hat{y}_2)}{\log(\hat{y}_1/\hat{y}_2)} \geq \hat{y}_1 + (1 - \hat{y}_1) \frac{\log(1 - \hat{y}_1) - \log(1 - \hat{y}_1/\delta)}{\log \hat{y}_1 - \log(\hat{y}_1/\delta)} = \frac{1}{C_{\hat{y}_1, \delta}}$$

Therefore (S8) also holds when  $\hat{y}_1 \geq \delta \hat{y}_2$ . □

*Proof of Proposition S3.* We first prove the case when  $y = 1$ . In this case, we have  $\theta \leq \hat{y}_1$ , and

$$\begin{aligned} L(\hat{y}_2, y) - L(\hat{y}_1, y) &= \log \frac{\hat{y}_1}{\hat{y}_2} \\ &\leq C_{\hat{y}_1, \delta} \mathcal{D}_{KL}(\hat{y}_1 \| \hat{y}_2) + \log \delta \\ &\leq C_{\theta, \delta} \mathcal{D}_{KL}(\hat{y}_1 \| \hat{y}_2) + \log \delta \end{aligned}$$

where the first and second inequalities are according to Lemmas S5 and S4. For  $y = 0$ , we can let  $y' = 1 - y$ ,  $\hat{y}'_1 = 1 - \hat{y}_1$ , and  $\hat{y}'_2 = 1 - \hat{y}_2$ , and use the same discussion for  $y'$ ,  $\hat{y}'_1$  and  $\hat{y}'_2$ . □
